# Supplementary material for: Brother of regulator of imprinted sites inhibits cisplatin-induced DNA damage in non-small cell lung cancer
Source: PubMed Central journal article supplement — Oncol Lett. 2020 Sep 17;20(5):251. doi: 10.3892/ol.2020.12114 (PMC7509674; doi:10.3892/ol.2020.12114), 2020-09-17
Supplement: Supplementary_Data.pdf [file Supplementary_Data.pdf]

Figure S1. *BORIS* knockdown efficiencies in NSCLC cells. *BORIS* siRNA-1 knockdown efficiencies were detected in H460 and A549 cells using RT-qPCR. *BORIS*, Brother of Regulator of Imprinted Sites; NSCLC, non-small cell lung cancer; RT-q, reverse transcription-quantitative; si, small interfering; nc, negative siRNA control.

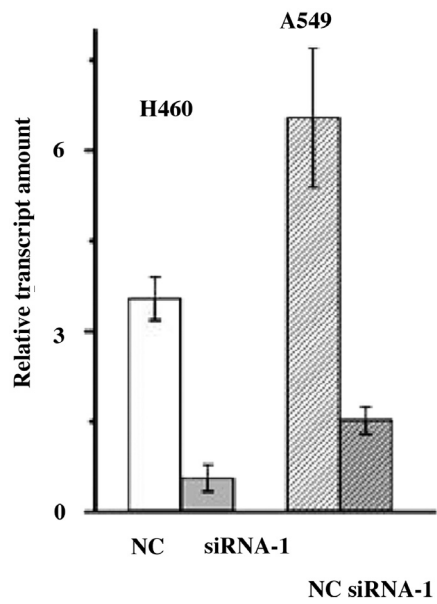

Table SI. siRNA sequences used in this study.

| siRNA           | Sense siRNA sequence (5' to 3') | Antisense siRNA sequence (5' to 3') |
|-----------------|---------------------------------|-------------------------------------|
| Negative (NC)   | UUCUCCGAACGUGUCACGUtt           | ACGUGACACGUUCGGAGAAtt               |
| BORIS siRNA-1 9 | GGAAAUACCACGAUGCAAAtt           | UUUGCAUCGUGGUAUUUCctt               |
| BORIS siRNA-2   | GGAUCAACCUACAGCUGGUtt           | ACCAGCUGUAGGUUGAUCCtt               |

Table III. Gene primer sequences used in this study.

| Gene name | Forward primer sequence (5' to 3') | Reverse primer sequence (5' to 3') |
|-----------|------------------------------------|------------------------------------|
| MLH1      | GCAAACCCCTGTCCAGTCAG               | CTGGGAGTTCAAGCATCTCCT              |
| MSH6      | CCAAGGCGAAGAACCTCAAC               | ACCAGGGGTAAACCCTCCATC              |
| MSH2      | AGGCATCCAAGGAGAATGATTG             | GGAATCCACATACCCAACCTCAA            |
| POLH      | GCTACTGGACAGGATCGAGTG              | CACCACCCTTCCATGATTGTA              |
| REV7      | TGGCTGTGCATCTCATCCTCT              | GCGGTGCTCTTTATCCAAAATCA            |
| XPA       | CCAGGACCTGTTATGGAATTTGA            | GCTTCTTGACTACCCCAAACCTC            |
| RRM1      | GCCGCCAAGAACGAGTCAT                | AGCAGCCAAAGTATCTAGTTCCA            |
| ERCC1     | CTACGCCGAATATGCCATCTC              | GTACGGGATTGCCCTCTG                 |
| XRCC4     | ATGGCTCCTCAGGAGAATCAGC             | GAGGTCTTCTGGGCTGCTGTTT             |
| RPA3      | AGCTCAATTCATCGACAAGCC              | TCTTCATCAAGGGGTCCATCA              |
| BRCA1     | ACTCTGAGGACAAAGCAGCG               | CATCCCTGGTTCCTTGAGGG               |
| CMYC      | GCTGCTTAGACGCTGGATTT               | CACCGAGTCGTAGTCGAGGT               |
| BORIS     | CAGGCCCTACAAGTGTAACGACTGCAA        | GCATTCGTAAGGCTTCTCACCTGAGTG        |
| GAPDH     | CCCACTCCTCCACCTTTGAC               | TGTTGCTGTAGCCAAATTCGT              |
| Actin     | AAAATCTGGCACCACACCTTC              | TAGCACAGCCTGGATAGCAA               |

Table SIII. Clinical information of lung cancer cases obtained from The Cancer Genome Atlas.

| ID           | Race                      | Sex    | Age, days | Stage        | Time as a smoker, years | Overall survival, days | Survival status | CTCFL, FPKM |
|--------------|---------------------------|--------|-----------|--------------|-------------------------|------------------------|-----------------|-------------|
| TCGA-92-8064 | White                     | Male   | 21417     | Not reported | 30                      | 160                    | Alive           | 0.003706529 |
| TCGA-46-3769 | White                     | Male   | 20941     | Not reported | Unknown                 | 135                    | Alive           | 0.003745556 |
| TCGA-73-7498 | White                     | Female | 21527     | Stage IA     | 28                      | 1189                   | Alive           | 0.004273033 |
| TCGA-38-7271 | White                     | Female | 26440     | Stage IA     | 28                      | 800                    | Deceased        | 0.01137023  |
| TCGA-43-8118 | White                     | Female | 20224     | Stage IA     | Unknown                 | 89                     | Deceased        | 0.05032881  |
| TCGA-86-8669 | White                     | Male   | 23443     | Stage IA     | Unknown                 | 938                    | Alive           | 0.009903544 |
| TCGA-85-7698 | White                     | Male   | 17651     | Stage IA     | Unknown                 | 952                    | Alive           | 0           |
| TCGA-86-8076 | White                     | Male   | 15605     | Stage IA     | Unknown                 | 993                    | Alive           | 0.003796628 |
| TCGA-60-2715 | White                     | Male   | 18990     | Stage IA     | 23                      | 1075                   | Deceased        | 1.601311    |
| TCGA-71-6725 | AsIAN                     | Female | 17793     | Stage IB     | Unknown                 | 256                    | Alive           | 0           |
| TCGA-05-4390 | Not reported              | Female | 21430     | Stage IB     | 30                      | 1126                   | Alive           | 0           |
| TCGA-64-5781 | White                     | Female | 20219     | Stage IB     | 25                      | 1559                   | Alive           | 0           |
| TCGA-44-8117 | White                     | Female | 19855     | Stage IB     | 36                      | 385                    | Alive           | 0           |
| TCGA-67-6215 | White                     | Female | 19310     | Stage IB     | Unknown                 | 174                    | Alive           | 0.002790337 |
| TCGA-69-7973 | White                     | Female | 15355     | Stage IB     | Unknown                 | 230                    | Alive           | 0.00720269  |
| TCGA-97-8175 | White                     | Female | 20206     | Stage IB     | Unknown                 | 551                    | Alive           | 0.006768008 |
| TCGA-NC-A5HI | White                     | Female | 24981     | Stage IB     | Unknown                 | 1743                   | Alive           | 0           |
| TCGA-97-7547 | White                     | Female | 24737     | Stage IB     | Unknown                 | 1965                   | Alive           | 0.003934357 |
| TCGA-44-4112 | White                     | Female | 22106     | Stage IB     | 20                      | 808                    | Deceased        | 0           |
| TCGA-86-8075 | White                     | Female | 24402     | Stage IB     | Unknown                 | 694                    | Deceased        | 0.001534132 |
| TCGA-55-7576 | Black or African American | Male   | 19917     | Stage IB     | Unknown                 | 670                    | Alive           | 0.006405735 |
| TCGA-66-2758 | Not reported              | Male   | 26209     | Stage IB     | 56                      | 639                    | Alive           | 0           |
| TCGA-63-A5ML | Not reported              | Male   | 24947     | Stage IB     | Unknown                 | 1386                   | Alive           | 0.01142347  |
| TCGA-63-A5MB | Not reported              | Male   | 22930     | Stage IB     | Unknown                 | 3123                   | Alive           | 0.0141921   |
| TCGA-18-3415 | Not reported              | Male   | 28430     | Stage IB     | Unknown                 | 2803                   | Deceased        | 0.005438079 |
| TCGA-85-6561 | White                     | Male   | 24234     | Stage IB     | 25                      | 1224                   | Alive           | 0.002726988 |
| TCGA-94-7033 | White                     | Male   | 26948     | Stage IB     | Unknown                 | 640                    | Alive           | 0.6420819   |
| TCGA-86-7955 | White                     | Male   | 22772     | Stage IB     | Unknown                 | 1072                   | Alive           | 0           |
| TCGA-60-2713 | White                     | Male   | 23630     | Stage IB     | Unknown                 | 1731                   | Alive           | 4.736141    |
| TCGA-MF-A522 | White                     | Male   | 20051     | Stage IB     | 43                      | 360                    | Deceased        | 0.3120991   |
| TCGA-18-3412 | White                     | Male   | 19025     | Stage IB     | Unknown                 | 345                    | Deceased        | 0           |
| TCGA-56-7222 | White                     | Male   | 22097     | Stage IB     | Unknown                 | 562                    | Deceased        | 0.01616647  |
| TCGA-78-7535 | White                     | Male   | 16571     | Stage IB     | Unknown                 | 949                    | Deceased        | 0.003086465 |
| TCGA-55-7910 | Black or African American | Female | 18289     | Stage iIA    | 15                      | 1040                   | Alive           | 0.004372795 |
| TCGA-69-8253 | Black or African American | Female | 21771     | Stage iIA    | 39                      | 426                    | Alive           | 0.001308101 |
| TCGA-55-8508 | Black or African American | Female | 22159     | Stage iIA    | Unknown                 | 617                    | Alive           | 0           |
| TCGA-92-7340 | White                     | Female | 16447     | Stage iIA    | 15                      | 82                     | Alive           | 0           |
| TCGA-78-7539 | White                     | Female | 27445     | Stage iIA    | 28                      | 791                    | Alive           | 0           |

Table SIII. Continued.

| ID           | Race                      | Sex    | Age, days | Stage     | Time as a smoker, years | Overall survival, days | Survival status | CTCFL, FPKM |
|--------------|---------------------------|--------|-----------|-----------|-------------------------|------------------------|-----------------|-------------|
| TCGA-56-7823 | White                     | Female | 21344     | Stage iIA | 40                      | 1011                   | Alive           | 0.4384901   |
| TCGA-60-2710 | White                     | Female | 24669     | Stage iIA | 42                      | 2024                   | Alive           | 0.004927271 |
| TCGA-86-8280 | White                     | Female | 19977     | Stage iIA | Unknown                 | 701                    | Alive           | 0           |
| TCGA-J2-8192 | White                     | Female | 23892     | Stage iIA | Unknown                 | 739                    | Alive           | 0.001401751 |
| TCGA-44-7670 | White                     | Female | 17392     | Stage iIA | Unknown                 | 882                    | Alive           | 0.0016534   |
| TCGA-53-7626 | White                     | Female | 28024     | Stage iIA | 35                      | 929                    | Deceased        | 0.006126425 |
| TCGA-MP-A4TF | White                     | Female | 21387     | Stage iIA | 40                      | 336                    | Deceased        | 0.003759098 |
| TCGA-90-A59Q | White                     | Female | 22420     | Stage iIA | Unknown                 | 322                    | Deceased        | 0.005833581 |
| TCGA-L9-A7SV | Black or African American | Male   | 25298     | Stage iIA | 31                      | 565                    | Alive           | 0.0511623   |
| TCGA-L9-A743 | Black or African American | Male   | 20780     | Stage iIA | Unknown                 | 664                    | Alive           | 0.004927484 |
| TCGA-95-7562 | Black or African American | Male   | 26000     | Stage iIA | 10                      | 87                     | Deceased        | 0.001675048 |
| TCGA-44-7669 | Black or African American | Male   | 21893     | Stage iIA | Unknown                 | 574                    | Deceased        | 0.06290768  |
| TCGA-05-5428 | Not reported              | Male   | 21061     | Stage iIA | 24                      | 670                    | Alive           | 0           |
| TCGA-63-A5MV | Not reported              | Male   | 25505     | Stage iIA | 50                      | 1100                   | Alive           | 0.03064842  |
| TCGA-63-7023 | Not reported              | Male   | Unknown   | Stage iIA | 56                      | 1682                   | Alive           | 6.111711    |
| TCGA-43-5670 | White                     | Male   | 25652     | Stage iIA | 10                      | 849                    | Alive           | 0.03004427  |
| TCGA-86-8674 | White                     | Male   | 18479     | Stage iIA | 30                      | 806                    | Alive           | 0.01150986  |
| TCGA-56-8629 | White                     | Male   | 23346     | Stage iIA | 33                      | 481                    | Alive           | 0.007528424 |
| TCGA-98-A53I | White                     | Male   | 23502     | Stage iIA | 35                      | 565                    | Alive           | 0.004600293 |
| TCGA-53-A4EZ | White                     | Male   | 23201     | Stage iIA | 40                      | 1071                   | Alive           | 0.01002955  |
| TCGA-85-6560 | White                     | Male   | 21768     | Stage iIA | 41                      | 1259                   | Alive           | 0.04771326  |
| TCGA-85-A512 | White                     | Male   | 16811     | Stage iIA | Unknown                 | 465                    | Alive           | 0           |
| TCGA-85-A50Z | White                     | Male   | 20941     | Stage iIA | Unknown                 | 493                    | Alive           | 0           |
| TCGA-85-8351 | White                     | Male   | 26437     | Stage iIA | Unknown                 | 510                    | Alive           | 0.007058051 |
| TCGA-J1-A4AH | White                     | Male   | 25893     | Stage iIA | Unknown                 | 581                    | Alive           | 0.07276112  |
| TCGA-96-A4JK | White                     | Male   | 23974     | Stage iIA | Unknown                 | 589                    | Alive           | 0           |
| TCGA-90-A4EE | White                     | Male   | 19676     | Stage iIA | Unknown                 | 688                    | Alive           | 0.002356203 |
| TCGA-86-8279 | White                     | Male   | 17032     | Stage iIA | Unknown                 | 949                    | Alive           | 0.001543741 |
| TCGA-85-8276 | White                     | Male   | 22707     | Stage iIA | Unknown                 | 1050                   | Alive           | 0           |
| TCGA-86-7713 | White                     | Male   | 25791     | Stage iIA | Unknown                 | 1157                   | Alive           | 0.004191116 |
| TCGA-39-5037 | White                     | Male   | 23868     | Stage iIA | Unknown                 | 1690                   | Alive           | 0.001924692 |
| TCGA-97-8174 | White                     | Male   | 24725     | Stage iIA | 20                      | 164                    | Deceased        | 0.01262879  |
| TCGA-73-4676 | White                     | Male   | 16746     | Stage iIA | 32                      | 281                    | Deceased        | 0.00795811  |
| TCGA-86-A4D0 | White                     | Male   | 17607     | Stage iIA | Unknown                 | 116                    | Deceased        | 0.0328592   |
| TCGA-60-2697 | White                     | Male   | 14984     | Stage iIA | Unknown                 | 372                    | Deceased        | 0.02515059  |
| TCGA-86-6562 | White                     | Male   | 19301     | Stage iIA | Unknown                 | 376                    | Deceased        | 0           |
| TCGA-58-8387 | White                     | Male   | 21952     | Stage iIA | Unknown                 | 403                    | Deceased        | 0.007360205 |

Table SIII. Continued.

| ID           | Race                      | Sex    | Age, days | Stage      | Time as a smoker, years | Overall survival, days | Survival status | CTCFL, FPKM |
|--------------|---------------------------|--------|-----------|------------|-------------------------|------------------------|-----------------|-------------|
| TCGA-49-6742 | White                     | Male   | 25839     | Stage IA   | Unknown                 | 488                    | Deceased        | 0.02494241  |
| TCGA-22-5483 | White                     | Male   | 27109     | Stage IA   | Unknown                 | 573                    | Deceased        | 0.2620126   |
| TCGA-86-7711 | White                     | Male   | 25719     | Stage IA   | Unknown                 | 1046                   | Deceased        | 0.001483221 |
| TCGA-69-A59K | Black or African American | Female | 22093     | Stage IIB  | 13                      | 522                    | Alive           | 0.002268292 |
| TCGA-05-4427 | Not reported              | Female | 23893     | Stage IIB  | 15                      | 791                    | Alive           | 0           |
| TCGA-63-A5MM | Not reported              | Female | 25348     | Stage IIB  | Unknown                 | 456                    | Deceased        | 0           |
| TCGA-75-6212 | Not reported              | Female | Unknown   | Stage IIB  | Unknown                 | 1516                   | Deceased        | 0.01065148  |
| TCGA-44-2659 | White                     | Female | 23808     | Stage IIB  | 38                      | 1367                   | Alive           | 0.001578634 |
| TCGA-60-2714 | White                     | Female | 24169     | Stage IIB  | 45                      | 1531                   | Alive           | 0           |
| TCGA-43-A475 | White                     | Female | 24680     | Stage IIB  | 50                      | 296                    | Alive           | 0.002137467 |
| TCGA-NC-A5HK | White                     | Female | 21531     | Stage IIB  | Unknown                 | 128                    | Alive           | 15.12191    |
| TCGA-86-8671 | White                     | Female | 26448     | Stage IIB  | Unknown                 | 839                    | Alive           | 0.002800628 |
| TCGA-86-8278 | White                     | Female | 23117     | Stage IIB  | Unknown                 | 944                    | Alive           | 0           |
| TCGA-44-2665 | White                     | Female | 20349     | Stage IIB  | Unknown                 | 1301                   | Alive           | 0.0019941   |
| TCGA-34-5240 | White                     | Female | 26735     | Stage IIB  | Unknown                 | 1541                   | Alive           | 0.001759984 |
| TCGA-78-7161 | White                     | Female | 25294     | Stage IIB  | 37                      | 291                    | Deceased        | 0.008313055 |
| TCGA-L3-A524 | White                     | Female | 16765     | Stage IIB  | Unknown                 | 490                    | Deceased        | 0.002482588 |
| TCGA-63-A5MP | Not reported              | Male   | 20818     | Stage IIB  | 41                      | 769                    | Alive           | 0.03874546  |
| TCGA-63-A5MT | Not reported              | Male   | 27263     | Stage IIB  | 50                      | 498                    | Alive           | 0           |
| TCGA-05-4432 | Not reported              | Male   | 24350     | Stage IIB  | Unknown                 | 761                    | Alive           | 0.08690919  |
| TCGA-63-A5MJ | Not reported              | Male   | 20018     | Stage IIB  | Unknown                 | 1824                   | Alive           | 0.001576362 |
| TCGA-NC-A5HE | White                     | Male   | 22179     | Stage IIB  | 20                      | 2336                   | Alive           | 0.002160821 |
| TCGA-94-A5I6 | White                     | Male   | 22949     | Stage IIB  | 40                      | 538                    | Alive           | 9.689448    |
| TCGA-95-7567 | White                     | Male   | 22437     | Stage IIB  | 41                      | 568                    | Alive           | 0.001514921 |
| TCGA-46-6025 | White                     | Male   | 26168     | Stage IIB  | Unknown                 | 324                    | Alive           | 0           |
| TCGA-91-7771 | White                     | Male   | 22926     | Stage IIB  | Unknown                 | 492                    | Alive           | 0           |
| TCGA-44-6146 | White                     | Male   | 23378     | Stage IIB  | Unknown                 | 728                    | Alive           | 0.02594052  |
| TCGA-90-6837 | White                     | Male   | 23511     | Stage IIB  | Unknown                 | 758                    | Alive           | 0.001803253 |
| TCGA-51-4081 | White                     | Male   | 20261     | Stage IIB  | Unknown                 | 911                    | Alive           | 0.01108768  |
| TCGA-85-7697 | White                     | Male   | 17921     | Stage IIB  | Unknown                 | 1063                   | Alive           | 0.01039483  |
| TCGA-50-8459 | White                     | Male   | 24859     | Stage IIB  | Unknown                 | 1119                   | Alive           | 0.009810654 |
| TCGA-86-8054 | White                     | Male   | 22584     | Stage IIB  | Unknown                 | 1148                   | Alive           | 0.008745673 |
| TCGA-62-A471 | White                     | Male   | 23689     | Stage IIB  | Unknown                 | 1246                   | Alive           | 0           |
| TCGA-18-4083 | White                     | Male   | 23125     | Stage IIB  | Unknown                 | 188                    | Deceased        | 0.4162064   |
| TCGA-60-2698 | White                     | Male   | 22800     | Stage IIB  | Unknown                 | 311                    | Deceased        | 0.003617621 |
| TCGA-NC-A5HJ | White                     | Male   | 21730     | Stage IIB  | Unknown                 | 418                    | Deceased        | 0.1504026   |
| TCGA-69-7974 | White                     | Female | 20021     | Stage IIIA | 30                      | 184                    | Alive           | 0.001508818 |
| TCGA-95-A4VK | White                     | Female | 27040     | Stage IIIA | 30                      | 651                    | Alive           | 0           |

Table SIII. Continued.

| ID           | Race                      | Sex    | Age, days | Stage      | Time as a smoker, years | Overall survival, days | Survival status | CTCFL, FPKM |
|--------------|---------------------------|--------|-----------|------------|-------------------------|------------------------|-----------------|-------------|
| TCGA-43-2576 | White                     | Female | 22805     | Stage IIIA | 35                      | 1223                   | Alive           | 0           |
| TCGA-44-6774 | White                     | Female | 20462     | Stage IIIA | Unknown                 | 658                    | Alive           | 0           |
| TCGA-86-A4P8 | White                     | Female | 21738     | Stage IIIA | Unknown                 | 805                    | Alive           | 0           |
| TCGA-43-2581 | White                     | Female | 17447     | Stage IIIA | Unknown                 | 1176                   | Alive           | 0.005546505 |
| TCGA-34-8454 | White                     | Female | 22913     | Stage IIIA | Unknown                 | 1180                   | Alive           | 0           |
| TCGA-50-5941 | White                     | Female | 20350     | Stage IIIA | Unknown                 | 1474                   | Alive           | 0.003292149 |
| TCGA-49-6743 | White                     | Female | 29807     | Stage IIIA | Unknown                 | 1621                   | Alive           | 0.005645223 |
| TCGA-64-1679 | White                     | Female | 21310     | Stage IIIA | Unknown                 | 2488                   | Alive           | 0.001385408 |
| TCGA-MP-A4T9 | White                     | Female | 19767     | Stage IIIA | 24                      | 1265                   | Deceased        | 0           |
| TCGA-56-8625 | White                     | Female | 24188     | Stage IIIA | Unknown                 | 315                    | Deceased        | 0.005569762 |
| TCGA-49-4490 | White                     | Female | 16634     | Stage IIIA | Unknown                 | 385                    | Deceased        | 0.00412023  |
| TCGA-62-A46Y | White                     | Female | 25905     | Stage IIIA | Unknown                 | 414                    | Deceased        | 0.002380326 |
| TCGA-55-6970 | White                     | Female | 24773     | Stage IIIA | Unknown                 | 464                    | Deceased        | 0.003391175 |
| TCGA-NJ-A7XG | Black or African American | Male   | 18127     | Stage IIIA | Unknown                 | 617                    | Alive           | 0           |
| TCGA-LA-A7SW | Black or African American | Male   | 26116     | Stage IIIA | 50                      | 408                    | Deceased        | 0           |
| TCGA-05-4384 | Not reported              | Male   | 24411     | Stage IIIA | 24                      | 426                    | Alive           | 0.003277499 |
| TCGA-63-A5MI | Not reported              | Male   | 24040     | Stage IIIA | Unknown                 | 1784                   | Alive           | 0.03163827  |
| TCGA-MP-A4T8 | Not reported              | Male   | 25069     | Stage IIIA | 15                      | 161                    | Deceased        | 0.004389524 |
| TCGA-60-2724 | White                     | Male   | 17462     | Stage IIIA | 30                      | 717                    | Alive           | 0.001786079 |
| TCGA-64-5779 | White                     | Male   | 22305     | Stage IIIA | 40                      | 864                    | Alive           | 0.01960708  |
| TCGA-NC-A5HG | White                     | Male   | 21608     | Stage IIIA | 40                      | 1963                   | Alive           | 0.002221102 |
| TCGA-91-6848 | White                     | Male   | 21829     | Stage IIIA | Unknown                 | 224                    | Alive           | 1.482618    |
| TCGA-55-8505 | White                     | Male   | 22676     | Stage IIIA | Unknown                 | 440                    | Alive           | 0.006001402 |
| TCGA-33-6738 | White                     | Male   | 29368     | Stage IIIA | Unknown                 | 1927                   | Alive           | 0           |
| TCGA-73-4659 | White                     | Male   | 24253     | Stage IIIA | 12                      | 711                    | Deceased        | 0.004158494 |
| TCGA-MP-A4TC | White                     | Male   | 28471     | Stage IIIA | 32                      | 74                     | Deceased        | 0.002328795 |
| TCGA-85-7699 | White                     | Male   | 26965     | Stage IIIA | 37                      | 1001                   | Deceased        | 0.001531999 |
| TCGA-39-5040 | White                     | Male   | 21790     | Stage IIIA | 41                      | 519                    | Deceased        | 0.01101034  |
| TCGA-73-4675 | White                     | Male   | 21614     | Stage IIIA | 41                      | 922                    | Deceased        | 0.004158244 |
| TCGA-39-5029 | White                     | Male   | 24713     | Stage IIIA | 48                      | 740                    | Deceased        | 0.0860438   |
| TCGA-85-6798 | White                     | Male   | 20837     | Stage IIIA | Unknown                 | 195                    | Deceased        | 0           |
| TCGA-50-5072 | White                     | Male   | 27036     | Stage IIIA | Unknown                 | 250                    | Deceased        | 0.02501661  |
| TCGA-MP-A4TD | White                     | Male   | 25983     | Stage IIIA | Unknown                 | 307                    | Deceased        | 0.007501256 |
| TCGA-66-2778 | Not reported              | Female | 25080     | Stage IIIB | 37                      | 578                    | Alive           | 0           |
| TCGA-53-7813 | White                     | Female | 18875     | Stage IIIB | 35                      | 424                    | Alive           | 0.009517636 |
| TCGA-55-A48Z | White                     | Female | 22056     | Stage IIIB | 40                      | 651                    | Alive           | 0.002505422 |
| TCGA-66-2783 | Not reported              | Male   | 24686     | Stage IIIB | 43                      | 759                    | Alive           | 0           |
| TCGA-05-4425 | Not reported              | Female | 25902     | Stage IV   | Unknown                 | 669                    | Alive           | 0.00299322  |

Table SIII. Continued.

| ID           | Race         | Sex    | Age, days | Stage    | Time as a smoker, years | Overall survival, days | Survival status | CTCFL, FPKM |
|--------------|--------------|--------|-----------|----------|-------------------------|------------------------|-----------------|-------------|
| TCGA-78-7145 | White        | Female | 19080     | Stage IV | 25                      | 826                    | Deceased        | 0.002695597 |
| TCGA-53-7624 | White        | Female | 14794     | Stage IV | Unknown                 | 1043                   | Deceased        | 0.01903924  |
| TCGA-18-3417 | Not reported | Male   | 24019     | Stage IV | 26                      | 1097                   | Deceased        | 0           |
| TCGA-86-7701 | White        | Male   | 24209     | Stage IV | Unknown                 | 947                    | Alive           | 0           |
| TCGA-NC-A5HP | White        | Male   | 25286     | Stage IV | Unknown                 | 770                    | Deceased        | 0.01535616  |

TCGA, The Cancer Genome Atlas.



Table SIV. Clinical information of 23 cases who have records of treatment outcomes.

| ID           | ID shown in Fig. 1B | Response on therapy         | Sex    | Age, days | Overall survival time, days | Survival status | CTCFL, FPKM | Tissue collection indicator |
|--------------|---------------------|-----------------------------|--------|-----------|-----------------------------|-----------------|-------------|-----------------------------|
| TCGA-69-A59K | 69-A59K             | Stable disease              | Female | 22093     | 522                         | Alive           | 0.002268292 | Prospective                 |
| TCGA-95-A4VK | 95-A4VK             | Stable disease              | Female | 27040     | 651                         | Alive           | 0           | Prospective                 |
| TCGA-NJ-A7XG | NJ-A7XG             | Stable disease              | Male   | 18127     | 617                         | Alive           | 0           | Prospective                 |
| TCGA-44-8117 | 44-8117             | Complete remission/response | Female | 19855     | 385                         | Alive           | 0           | Prospective                 |
| TCGA-55-8508 | 55-8508             | Complete remission/response | Female | 22159     | 617                         | Alive           | 0           | Prospective                 |
| TCGA-86-8280 | 86-8280             | Complete remission/response | Female | 19977     | 701                         | Alive           | 0           | Prospective                 |
| TCGA-86-A4P8 | 86-A4P8             | Complete remission/response | Female | 21738     | 805                         | Alive           | 0           | Prospective                 |
| TCGA-86-8278 | 86-8278             | Complete remission/response | Female | 23117     | 944                         | Alive           | 0           | Prospective                 |
| TCGA-86-8279 | 86-8279             | Complete remission/response | Male   | 17032     | 949                         | Alive           | 0.001543741 | Prospective                 |
| TCGA-86-8671 | 86-8671             | Complete remission/response | Female | 26448     | 839                         | Alive           | 0.002800628 | Prospective                 |
| TCGA-L9-A743 | L9-A743             | Complete remission/response | Male   | 20780     | 664                         | Alive           | 0.004927484 | Prospective                 |
| TCGA-55-8505 | 55-8505             | Complete remission/response | Male   | 22676     | 440                         | Alive           | 0.006001402 | Prospective                 |
| TCGA-97-8175 | 97-8175             | Complete remission/response | Female | 20206     | 551                         | Alive           | 0.006768008 | Prospective                 |
| TCGA-86-8674 | 86-8674             | Complete remission/response | Male   | 18479     | 806                         | Alive           | 0.01150986  | Prospective                 |
| TCGA-L9-A7SV | L9-A7SV             | Complete remission/response | Male   | 25298     | 565                         | Alive           | 0.0511623   | Prospective                 |
| TCGA-50-8459 | 50-8459             | Progressive disease         | Male   | 24859     | 1119                        | Alive           | 0.009810654 | Prospective                 |
| TCGA-62-A471 | 62-A471             | Complete remission/response | Male   | 23689     | 1246                        | Alive           | 0           | Retrospective               |
| TCGA-MP-A4T9 | MP-A4T9             | Complete remission/response | Female | 19767     | 1265                        | Deceased        | 0           | Retrospective               |
| TCGA-MP-A4TC | MP-A4TC             | Complete remission/response | Male   | 28471     | 74                          | Deceased        | 0.002328795 | Retrospective               |
| TCGA-62-A46Y | 62-A46Y             | Complete remission/response | Female | 25905     | 414                         | Deceased        | 0.002380326 | Retrospective               |
| TCGA-73-7498 | 73-7498             | Complete remission/response | Female | 21527     | 1189                        | Alive           | 0.004273033 | Retrospective               |
| TCGA-MP-A4TD | MP-A4TD             | Complete remission/response | Male   | 25983     | 307                         | Deceased        | 0.007501256 | Retrospective               |
| TCGA-MP-A4TF | MP-A4TF             | Partial remission/response  | Female | 21387     | 336                         | Deceased        | 0.003759098 | Retrospective               |

TCGA, The Cancer Genome Atlas.
